# Supplementary material
Source: PubMed Central journal article supplement (PMC6800620)
Supplement: NIHMS1530043-supplement-1.pdf [file NIHMS1530043-supplement-1.pdf]

Supplementary Materials for:

***APOE* Effects on Cognition From Childhood To Adolescence**

Chandra A. Reynolds[1]\*, Andrew Smolen[2], Robin P. Corley [2], Elizabeth Munoz [1], Naomi P. Friedman [2], Soo Hyun Rhee [2], Michael C. Stallings [2], John C. DeFries [2], and Sally J. Wadsworth [2]

Corresponding Author E-mail: [chandra.reynolds@ucr.edu](mailto:chandra.reynolds@ucr.edu)

**This supplement includes an Appendix with:**

Tables S1 to S7

Figure S1

## Appendix

**Table S1. APOE genotype and allele frequencies in unrelated persons from the CAP and LTS samples.**

|                            |                 | <i>Unrelated<br/>(CAP + LTS)</i> |                 |                       |
|----------------------------|-----------------|----------------------------------|-----------------|-----------------------|
| <i>APOE genotype</i>       | <i>rs429358</i> | <i>rs7412</i>                    | <i>N</i>        | <i>Percent</i>        |
| ε22                        | T/T             | T/T                              | 8               | 1.05                  |
| ε23                        | T/T             | C/T                              | 85              | 11.18                 |
| ε24                        | C/T             | C/T                              | 19              | 2.50                  |
| ε33                        | T/T             | C/C                              | 465             | 61.18                 |
| ε34                        | C/T             | C/C                              | 173             | 22.76                 |
| ε44                        | C/C             | C/C                              | 10              | 1.32                  |
| TOTAL                      |                 |                                  | 760             | --                    |
| <b><i>APOE Alleles</i></b> |                 |                                  | <b><i>N</i></b> | <b><i>Percent</i></b> |
| ε2                         | --              | --                               | 120             | 7.89                  |
| ε3                         | --              | --                               | 1188            | 78.16                 |
| ε4                         | --              | --                               | 212             | 13.95                 |
| Total                      | --              | --                               | 1520            | --                    |

*Note.* CAP = Colorado Adoption Project; LTS = Longitudinal Twin Study.

**Table S2. Multilevel random effects for IQ across the Year 7, 12 and 16 assessments: conditional on APOE.**

| Random Effects        |    | Verbal IQ  |                    |            |                    | Performance IQ |                    |            |                    | Full Scale IQ |                    |            |                    |
|-----------------------|----|------------|--------------------|------------|--------------------|----------------|--------------------|------------|--------------------|---------------|--------------------|------------|--------------------|
|                       |    | Model I    |                    | Model II   |                    | Model I        |                    | Model II   |                    | Model I       |                    | Model II   |                    |
|                       |    | $\sigma^2$ | se                 | $\sigma^2$ | se                 | $\sigma^2$     | se                 | $\sigma^2$ | se                 | $\sigma^2$    | se                 | $\sigma^2$ | se                 |
| Intercept             |    |            |                    |            |                    |                |                    |            |                    |               |                    |            |                    |
| $\sigma_{between}^2$  | A  | 14.86      | 12.37 <sup>ˆ</sup> | 13.88      | 12.34 <sup>ˆ</sup> | 1.19           | 18.18 <sup>ˆ</sup> | 2.15       | 18.19 <sup>ˆ</sup> | 13.79         | 13.49 <sup>ˆ</sup> | 13.50      | 13.43 <sup>ˆ</sup> |
|                       | C  | 46.80      | 10.98 <sup>c</sup> | 48.51      | 10.91 <sup>c</sup> | 22.10          | 11.53 <sup>a</sup> | 23.86      | 11.57 <sup>a</sup> | 40.97         | 10.42 <sup>c</sup> | 42.19      | 10.35 <sup>c</sup> |
|                       | DZ | 112.49     | 15.23 <sup>c</sup> | 111.87     | 15.17 <sup>c</sup> | 50.79          | 9.83 <sup>c</sup>  | 48.80      | 9.66 <sup>c</sup>  | 82.27         | 12.00 <sup>c</sup> | 81.13      | 11.89 <sup>c</sup> |
|                       | MZ | 149.21     | 15.06 <sup>c</sup> | 149.81     | 15.12 <sup>c</sup> | 112.81         | 11.96 <sup>c</sup> | 111.69     | 11.86 <sup>c</sup> | 131.63        | 13.21 <sup>c</sup> | 131.33     | 13.18 <sup>c</sup> |
| $\sigma_{within}^2$   | A  | 62.93      | 14.05 <sup>c</sup> | 64.18      | 14.19 <sup>c</sup> | 109.37         | 22.24 <sup>c</sup> | 107.85     | 22.05 <sup>c</sup> | 78.58         | 15.58 <sup>c</sup> | 78.71      | 15.54 <sup>c</sup> |
|                       | C  | 32.87      | 8.43 <sup>c</sup>  | 30.31      | 8.13 <sup>c</sup>  | 56.63          | 12.59 <sup>c</sup> | 55.26      | 12.48 <sup>c</sup> | 37.30         | 8.45 <sup>c</sup>  | 35.54      | 8.23 <sup>c</sup>  |
|                       | DZ | 49.54      | 6.83 <sup>c</sup>  | 49.19      | 6.80 <sup>c</sup>  | 53.33          | 7.63 <sup>c</sup>  | 53.38      | 7.63 <sup>c</sup>  | 49.31         | 6.38 <sup>c</sup>  | 49.09      | 6.36 <sup>c</sup>  |
|                       | MZ | 1.25       | 1.95 <sup>ˆ</sup>  | 1.24       | 1.95 <sup>ˆ</sup>  | 4.47           | 2.32 <sup>a</sup>  | 4.46       | 2.32 <sup>a</sup>  | 2.40          | 1.49 <sup>ˆ</sup>  | 2.40       | 1.49 <sup>ˆ</sup>  |
| $\sigma_{residual}^2$ | A  | 49.09      | 3.72 <sup>c</sup>  | 49.08      | 3.72 <sup>c</sup>  | 52.52          | 3.97 <sup>c</sup>  | 52.48      | 3.96 <sup>c</sup>  | 37.48         | 2.84 <sup>c</sup>  | 37.46      | 2.84 <sup>c</sup>  |
|                       | C  | 44.23      | 3.07 <sup>c</sup>  | 44.21      | 3.06 <sup>c</sup>  | 57.45          | 3.97 <sup>c</sup>  | 57.48      | 3.98 <sup>c</sup>  | 33.07         | 2.27 <sup>c</sup>  | 33.08      | 2.27 <sup>c</sup>  |
|                       | DZ | 43.57      | 2.39 <sup>c</sup>  | 43.58      | 2.39 <sup>c</sup>  | 53.82          | 2.97 <sup>c</sup>  | 53.83      | 2.97 <sup>c</sup>  | 33.17         | 1.82 <sup>c</sup>  | 33.18      | 1.82 <sup>c</sup>  |
|                       | MZ | 46.79      | 2.45 <sup>c</sup>  | 46.79      | 2.45 <sup>c</sup>  | 50.97          | 2.63 <sup>c</sup>  | 50.97      | 2.63 <sup>c</sup>  | 33.25         | 1.73 <sup>c</sup>  | 33.25      | 1.73 <sup>c</sup>  |

<sup>a</sup> $p < .05$ , <sup>b</sup> $p < .01$ , <sup>c</sup> $p < .001$ ; <sup>f</sup> $p < .05$  1-tailed, FDR corrected, <sup>t</sup> $p < .05$  2-tailed, FDR corrected

Note.  $N = 1321$ . Covariates included: Study (CAP = -.5, LTS = .5), Adopted (0=Not, 1=Adopted), Sex (Male = 0, Female = 1), Age centered at 16 years,  $\epsilon_2$  number of alleles (0,1,2);  $\epsilon_4$  number of alleles (0,1,2).

Random effects by family type are denoted as: A=Adoptive, C=Control, DZ=dizygotic twins,

MZ=monozygotic twins.  $\sigma_{within}^2$  = variance in IQ performance within sibships that is systematic across assessments (indicative of sibling dissimilarity);  $\sigma_{between}^2$  = variance in IQ performance between sibships that is systematic across assessments (indicative of sibling similarity);  $\sigma_{residual}^2$  = within-person, occasion-specific variance.

**Table S3. Multilevel fixed effects: APOE ε4 effects on IQ at the Year 7 assessment.**

| Verbal IQ<br>Fixed Effects      | Model I |                   |        |        | Model II |                   |        |        |
|---------------------------------|---------|-------------------|--------|--------|----------|-------------------|--------|--------|
|                                 | B       | se                | LL     | UL     | B        | se                | LL     | UL     |
| Intercept                       | 112.24  | 0.97 <sup>c</sup> | 110.32 | 114.15 | 111.88   | 1.02 <sup>c</sup> | 109.89 | 113.88 |
| Study                           | -8.00   | 1.08 <sup>c</sup> | -10.11 | -5.89  | -7.93    | 1.08 <sup>c</sup> | -10.05 | -5.82  |
| Adopted                         | -3.94   | 1.27 <sup>b</sup> | -6.43  | -1.45  | -3.88    | 1.27 <sup>b</sup> | -6.38  | -1.39  |
| Sex                             | -1.82   | 0.91 <sup>a</sup> | -3.60  | -0.03  | -1.03    | 1.10 <sup>ˆ</sup> | -3.20  | 1.13   |
| Age                             | -6.96   | 1.25 <sup>c</sup> | -9.41  | -4.50  | -7.02    | 1.25 <sup>c</sup> | -9.47  | -4.57  |
| ε2                              | -0.02   | 1.08 <sup>ˆ</sup> | -2.14  | 2.09   | 0.34     | 1.57 <sup>ˆ</sup> | -2.75  | 3.43   |
| ε4                              | -1.27   | 0.88 <sup>ˆ</sup> | -2.99  | 0.46   | -0.14    | 1.20 <sup>ˆ</sup> | -2.50  | 2.22   |
| Sex*ε2                          | --      | --                | --     | --     | -0.73    | 2.06 <sup>ˆ</sup> | -4.78  | 3.32   |
| Sex*ε4                          | --      | --                | --     | --     | -2.40    | 1.75 <sup>ˆ</sup> | -5.84  | 1.03   |
| Performance IQ<br>Fixed Effects | Model I |                   |        |        | Model II |                   |        |        |
|                                 | B       | se                | LL     | UL     | B        | se                | LL     | UL     |
| Intercept                       | 114.31  | 0.88 <sup>c</sup> | 112.58 | 116.04 | 114.04   | 0.92 <sup>c</sup> | 112.24 | 115.85 |
| Study                           | -5.98   | 0.99 <sup>c</sup> | -7.91  | -4.04  | -5.92    | 0.99 <sup>c</sup> | -7.86  | -3.99  |
| Adopted                         | -1.38   | 1.21 <sup>ˆ</sup> | -3.77  | 1.00   | -1.34    | 1.21 <sup>ˆ</sup> | -3.73  | 1.04   |
| Sex                             | -2.70   | 0.82 <sup>b</sup> | -4.31  | -1.09  | -2.07    | 1.00 <sup>a</sup> | -4.03  | -0.10  |
| Age                             | -2.60   | 1.12 <sup>a</sup> | -4.80  | -0.39  | -2.67    | 1.12 <sup>a</sup> | -4.88  | -0.47  |
| ε2                              | 1.18    | 1.00 <sup>ˆ</sup> | -0.79  | 3.15   | 0.93     | 1.48 <sup>ˆ</sup> | -1.97  | 3.83   |
| ε4                              | -1.95   | 0.81 <sup>a</sup> | -3.54  | -0.36  | -0.80    | 1.12 <sup>ˆ</sup> | -3.00  | 1.39   |
| Sex*ε2                          | --      | --                | --     | --     | 0.37     | 1.91 <sup>ˆ</sup> | -3.39  | 4.12   |
| Sex*ε4                          | --      | --                | --     | --     | -2.43    | 1.62 <sup>ˆ</sup> | -5.61  | 0.74   |
| Full Scale IQ<br>Fixed Effects  | Model I |                   |        |        | Model II |                   |        |        |
|                                 | B       | se                | LL     | UL     | B        | se                | LL     | UL     |
| Intercept                       | 114.68  | 0.89 <sup>c</sup> | 112.95 | 116.42 | 114.33   | 0.92 <sup>c</sup> | 112.52 | 116.14 |
| Study                           | -7.89   | 0.98 <sup>c</sup> | -9.82  | -5.96  | -7.82    | 0.98 <sup>c</sup> | -9.75  | -5.89  |
| Adopted                         | -3.14   | 1.17 <sup>b</sup> | -5.44  | -0.84  | -3.09    | 1.17 <sup>b</sup> | -5.39  | -0.78  |
| Sex                             | -2.69   | 0.83 <sup>b</sup> | -4.31  | -1.06  | -1.88    | 1.00 <sup>ˆ</sup> | -3.85  | 0.09   |
| Age                             | -5.43   | 1.13 <sup>c</sup> | -7.66  | -3.20  | -5.51    | 1.13 <sup>c</sup> | -7.74  | -3.29  |
| ε2                              | 0.50    | 0.99 <sup>ˆ</sup> | -1.44  | 2.44   | 0.69     | 1.43 <sup>ˆ</sup> | -2.12  | 3.49   |
| ε4                              | -1.85   | 0.80 <sup>a</sup> | -3.41  | -0.28  | -0.61    | 1.09 <sup>ˆ</sup> | -2.74  | 1.53   |
| Sex*ε2                          | --      | --                | --     | --     | -0.41    | 1.85 <sup>ˆ</sup> | -4.05  | 3.23   |
| Sex*ε4                          | --      | --                | --     | --     | -2.63    | 1.59 <sup>ˆ</sup> | -5.75  | 0.48   |

<sup>a</sup> $p < .05$ , <sup>b</sup> $p < .01$ , <sup>c</sup> $p < .001$ ; <sup>f</sup> $p < .05$  1-tailed, FDR corrected, <sup>t</sup> $p < .05$  2-tailed, FDR corrected. LL, UL = lower and upper 95% confidence interval.

Note.  $N = 1176 - 1177$ . Covariates included: Study (CAP = -.5, LTS = .5), Adopted (0=Not, 1=Adopted); Sex (Male = 0, Female = 1); Age was centered at 7 years; ε2 = number of alleles (0,1,2); ε4 = number of alleles (0,1,2).

**Table S4. Multilevel random effects for IQ at the Year 7 assessment: conditional on APOE.**

| Random Effects       | Verbal IQ  |        |                    |        | Performance IQ     |        |                    |        | Full Scale IQ      |        |                    |        |                    |
|----------------------|------------|--------|--------------------|--------|--------------------|--------|--------------------|--------|--------------------|--------|--------------------|--------|--------------------|
|                      | Model I    |        | Model II           |        | Model I            |        | Model II           |        | Model I            |        | Model II           |        |                    |
| Intercept            | $\sigma^2$ | se     | $\sigma^2$         | se     | $\sigma^2$         | se     | $\sigma^2$         | se     | $\sigma^2$         | se     | $\sigma^2$         | se     |                    |
| $\sigma_{between}^2$ | A          | 1.07   | 21.42 <sup>a</sup> | 0.00   | .                  | 9.46   | 20.51 <sup>a</sup> | 7.28   | 20.25 <sup>a</sup> | 0.00   | .                  | 0.00   | .                  |
|                      | C          | 52.78  | 19.34 <sup>b</sup> | 54.79  | 19.36 <sup>b</sup> | 55.53  | 15.86 <sup>c</sup> | 56.01  | 16.00 <sup>c</sup> | 54.56  | 14.83 <sup>c</sup> | 55.77  | 14.86 <sup>c</sup> |
|                      | DZ         | 139.66 | 20.30 <sup>c</sup> | 138.40 | 20.19 <sup>c</sup> | 65.12  | 13.20 <sup>c</sup> | 63.15  | 13.09 <sup>c</sup> | 106.91 | 16.07 <sup>c</sup> | 105.04 | 15.93 <sup>c</sup> |
|                      | MZ         | 147.17 | 16.90 <sup>c</sup> | 147.23 | 16.90 <sup>c</sup> | 118.63 | 14.26 <sup>c</sup> | 118.09 | 14.21 <sup>c</sup> | 129.29 | 14.37 <sup>c</sup> | 128.92 | 14.33 <sup>c</sup> |
| $\sigma_{within}^2$  | A          | 143.43 | 26.11 <sup>c</sup> | 145.34 | 15.48 <sup>c</sup> | 123.81 | 23.69 <sup>c</sup> | 125.77 | 23.74 <sup>c</sup> | 125.23 | 13.32 <sup>c</sup> | 125.56 | 13.36 <sup>c</sup> |
|                      | C          | 92.97  | 17.86 <sup>c</sup> | 90.30  | 17.61 <sup>c</sup> | 75.41  | 13.74 <sup>c</sup> | 75.37  | 13.81 <sup>c</sup> | 65.07  | 12.39 <sup>c</sup> | 63.63  | 12.23 <sup>c</sup> |
|                      | DZ         | 90.27  | 9.72 <sup>c</sup>  | 90.20  | 9.72 <sup>c</sup>  | 96.80  | 10.34 <sup>c</sup> | 97.25  | 10.39 <sup>c</sup> | 76.89  | 8.27 <sup>c</sup>  | 77.17  | 8.31 <sup>c</sup>  |
|                      | MZ         | 47.66  | 4.63 <sup>c</sup>  | 47.66  | 4.63 <sup>c</sup>  | 50.23  | 4.88 <sup>c</sup>  | 50.23  | 4.88 <sup>c</sup>  | 33.08  | 3.21 <sup>c</sup>  | 33.08  | 3.21 <sup>c</sup>  |

<sup>a</sup> $p < .05$ , <sup>b</sup> $p < .01$ , <sup>c</sup> $p < .001$ ; <sup>f</sup> $p < .05$  1-tailed, FDR corrected, <sup>t</sup> $p < .05$  2-tailed, FDR corrected

Note.  $N = 1176 - 1177$ . Covariates included: Study (CAP = -.5, LTS = .5), Sex (Male = 0, Female = 1), Adopted (0=Not, 1=Adopted); Age at assessment (centered at 16 years);  $\epsilon_2$  number of alleles (0,1,2);  $\epsilon_4$  number of alleles (0,1,2). Random effects by family type are denoted as: A=Adoptive, C=Control, DZ=dizygotic twins, MZ=monozygotic twins.  $\sigma_{between}^2$  = variance in IQ performance between sibships that is systematic at the assessment (indicative of sibling similarity);  $\sigma_{within}^2$  = residual variance reflecting within-pair variance at the assessment (indicative of sibling dissimilarity).

**Table S5. Multilevel fixed effects of APOE ε4 on IQ across Year 7, 12 and 16 assessments: adding sex by study, race and ethnicity covariates.**

| Verbal IQ<br>Fixed Effects      | Model I |                     |        |        | Model II |                     |        |        |
|---------------------------------|---------|---------------------|--------|--------|----------|---------------------|--------|--------|
|                                 | B       | se                  | LL     | UL     | B        | se                  | LL     | UL     |
| Intercept                       | 105.50  | 1.43 <sup>c</sup>   | 102.69 | 108.31 | 104.97   | 1.46 <sup>c</sup>   | 102.11 | 107.83 |
| Study                           | -7.48   | 1.16 <sup>c</sup>   | -9.76  | -5.20  | -7.36    | 1.16 <sup>c</sup>   | -9.64  | -5.09  |
| Adopted                         | -3.45   | 0.99 <sup>c</sup>   | -5.38  | -1.52  | -3.37    | 0.99 <sup>c</sup>   | -5.31  | -1.44  |
| Sex                             | -1.88   | 0.73 <sup>a</sup>   | -3.32  | -0.43  | -0.91    | 0.88 <sup>-</sup>   | -2.63  | 0.82   |
| Sex*study                       | 3.41    | 1.47 <sup>a</sup>   | 0.53   | 6.29   | 3.29     | 1.47 <sup>a</sup>   | 0.41   | 6.17   |
| Age                             | -0.36   | 0.03 <sup>c</sup>   | -0.43  | -0.30  | -0.36    | 0.03 <sup>c</sup>   | -0.43  | -0.30  |
| White                           | 1.02    | 1.32 <sup>-</sup>   | -1.57  | 3.61   | 1.06     | 1.32 <sup>-</sup>   | -1.53  | 3.65   |
| Hispanic                        | -5.41   | 1.99 <sup>b</sup>   | -9.32  | -1.50  | -5.32    | 1.99 <sup>b</sup>   | -9.23  | -1.41  |
| ε2                              | -0.48   | 0.86 <sup>-</sup>   | -2.17  | 1.20   | 0.11     | 1.21 <sup>-</sup>   | -2.27  | 2.49   |
| ε4                              | -1.73   | 0.70 <sup>a,f</sup> | -3.10  | -0.37  | -0.42    | 0.94 <sup>-</sup>   | -2.27  | 1.43   |
| Sex*ε2                          | --      | --                  | --     | --     | -1.13    | 1.59 <sup>-</sup>   | -4.25  | 1.98   |
| Sex*ε4                          | --      | --                  | --     | --     | -2.82    | 1.37 <sup>a,t</sup> | -5.50  | -0.13  |
| Performance IQ<br>Fixed Effects | Model I |                     |        |        | Model II |                     |        |        |
|                                 | B       | se                  | LL     | UL     | B        | se                  | LL     | UL     |
| Intercept                       | 104.81  | 1.47 <sup>c</sup>   | 101.93 | 107.68 | 104.42   | 1.49 <sup>c</sup>   | 101.51 | 107.34 |
| Study                           | -10.10  | 1.07 <sup>c</sup>   | -12.21 | -8.00  | -9.97    | 1.07 <sup>c</sup>   | -12.08 | -7.86  |
| Adopted                         | -1.35   | 1.06 <sup>-</sup>   | -3.43  | 0.74   | -1.27    | 1.07 <sup>-</sup>   | -3.36  | 0.82   |
| Sex                             | -1.14   | 0.70 <sup>-</sup>   | -2.50  | 0.23   | -0.36    | 0.86 <sup>-</sup>   | -2.03  | 1.32   |
| Sex*study                       | 3.98    | 1.39 <sup>b</sup>   | 1.25   | 6.71   | 3.85     | 1.39 <sup>b</sup>   | 1.12   | 6.57   |
| Age                             | -0.79   | 0.03 <sup>c</sup>   | -0.86  | -0.72  | -0.79    | 0.03 <sup>c</sup>   | -0.86  | -0.72  |
| White                           | 1.03    | 1.38 <sup>-</sup>   | -1.68  | 3.73   | 1.02     | 1.38 <sup>-</sup>   | -1.68  | 3.72   |
| Hispanic                        | -0.07   | 1.82 <sup>-</sup>   | -3.63  | 3.49   | -0.17    | 1.81 <sup>-</sup>   | -3.72  | 3.37   |
| ε2                              | -0.28   | 0.84 <sup>-</sup>   | -1.92  | 1.37   | -0.79    | 1.23 <sup>-</sup>   | -3.20  | 1.63   |
| ε4                              | -1.86   | 0.70 <sup>b,f</sup> | -3.24  | -0.48  | -0.29    | 0.97 <sup>-</sup>   | -2.18  | 1.61   |
| Sex*ε2                          | --      | --                  | --     | --     | 0.93     | 1.64 <sup>-</sup>   | -2.29  | 4.15   |
| Sex*ε4                          | --      | --                  | --     | --     | -3.32    | 1.40 <sup>a,t</sup> | -6.07  | -0.58  |
| Full Scale IQ<br>Fixed Effects  | Model I |                     |        |        | Model II |                     |        |        |
|                                 | B       | se                  | LL     | UL     | B        | se                  | LL     | UL     |
| Intercept                       | 105.47  | 1.38 <sup>c</sup>   | 102.76 | 108.18 | 104.98   | 1.40 <sup>c</sup>   | 102.23 | 107.74 |
| Study                           | -9.51   | 1.09 <sup>c</sup>   | -11.65 | -7.36  | -9.38    | 1.09 <sup>c</sup>   | -11.52 | -7.23  |
| Adopted                         | -2.75   | 1.00 <sup>b</sup>   | -4.71  | -0.79  | -2.68    | 1.00 <sup>b</sup>   | -4.64  | -0.71  |
| Sex                             | -1.67   | 0.70 <sup>a</sup>   | -3.03  | -0.30  | -0.75    | 0.84 <sup>-</sup>   | -2.40  | 0.91   |
| Sex*study                       | 4.01    | 1.40 <sup>b</sup>   | 1.27   | 6.75   | 3.88     | 1.39 <sup>b</sup>   | 1.15   | 6.61   |
| Age                             | -0.63   | 0.03 <sup>c</sup>   | -0.69  | -0.58  | -0.63    | 0.03 <sup>c</sup>   | -0.69  | -0.58  |
| White                           | 1.17    | 1.28 <sup>-</sup>   | -1.34  | 3.69   | 1.21     | 1.28 <sup>-</sup>   | -1.30  | 3.72   |
| Hispanic                        | -3.01   | 1.85 <sup>-</sup>   | -6.63  | 0.61   | -3.02    | 1.84 <sup>-</sup>   | -6.63  | 0.59   |
| ε2                              | -0.54   | 0.83 <sup>-</sup>   | -2.17  | 1.09   | -0.53    | 1.18 <sup>-</sup>   | -2.85  | 1.78   |
| ε4                              | -2.04   | 0.68 <sup>b,f</sup> | -3.37  | -0.71  | -0.51    | 0.92 <sup>-</sup>   | -2.32  | 1.29   |
| Sex*ε2                          | --      | --                  | --     | --     | -0.03    | 1.55 <sup>-</sup>   | -3.08  | 3.01   |
| Sex*ε4                          | --      | --                  | --     | --     | -3.29    | 1.34 <sup>a</sup>   | -5.92  | -0.66  |

<sup>a</sup> $p < .05$ , <sup>b</sup> $p < .01$ , <sup>c</sup> $p < .001$ ; <sup>f</sup> $p < .01$  1-tailed, FDR corrected, <sup>t</sup> $p < .05$  2-tailed, FDR corrected. LL, UL = lower and upper 95% confidence interval.

Note. Study (CAP = -.5, LTS = .5), Sex (Male = 0, Female = 1), Adopted (0=Not, 1=Adopted); Age was centered at 16 years; White (0=non-White, 1=White); Hispanic (0=non-Hispanic, 1= Hispanic); ε2 number of alleles (0,1,2); ε4 number of alleles (0,1,2). A=Adopted, C=Control, DZ=dizygotic twins; MZ=monozygotic twins. N = 1321.

**Table S6. Multilevel random effects of IQ across Year 7, 12 and 16 assessments: adding sex by project, race and ethnicity covariates.**

| Random Effects        |    | Verbal IQ  |                    |            |                    | Performance IQ |                    |            |                    | Full Scale IQ |                    |            |                    |
|-----------------------|----|------------|--------------------|------------|--------------------|----------------|--------------------|------------|--------------------|---------------|--------------------|------------|--------------------|
|                       |    | Model I    |                    | Model II   |                    | Model I        |                    | Model II   |                    | Model I       |                    | Model II   |                    |
|                       |    | $\sigma^2$ | se                 | $\sigma^2$ | se                 | $\sigma^2$     | se                 | $\sigma^2$ | se                 | $\sigma^2$    | se                 | $\sigma^2$ | se                 |
| Intercept             |    |            |                    |            |                    |                |                    |            |                    |               |                    |            |                    |
| $\sigma_{between}^2$  | A  | 16.21      | 12.32 <sup>h</sup> | 15.07      | 12.30 <sup>h</sup> | 0.96           | 18.00 <sup>h</sup> | 1.77       | 18.02 <sup>h</sup> | 13.92         | 13.31 <sup>h</sup> | 13.50      | 13.26 <sup>h</sup> |
|                       | C  | 47.37      | 11.01 <sup>c</sup> | 49.00      | 10.95 <sup>c</sup> | 21.06          | 11.34 <sup>a</sup> | 22.94      | 11.41 <sup>a</sup> | 40.79         | 10.37 <sup>c</sup> | 42.12      | 10.30 <sup>c</sup> |
|                       | DZ | 109.30     | 14.87 <sup>c</sup> | 108.74     | 14.81 <sup>c</sup> | 49.68          | 9.67 <sup>c</sup>  | 47.78      | 9.51 <sup>c</sup>  | 79.80         | 11.70 <sup>c</sup> | 78.70      | 11.59 <sup>c</sup> |
|                       | MZ | 142.32     | 14.42 <sup>c</sup> | 143.07     | 14.50 <sup>c</sup> | 112.10         | 11.89 <sup>c</sup> | 111.14     | 11.81 <sup>c</sup> | 128.36        | 12.88 <sup>c</sup> | 128.19     | 12.87 <sup>c</sup> |
| $\sigma_{within}^2$   | A  | 59.83      | 13.76 <sup>c</sup> | 61.27      | 13.94 <sup>c</sup> | 108.09         | 22.00 <sup>c</sup> | 106.76     | 21.85 <sup>c</sup> | 76.59         | 15.32 <sup>c</sup> | 76.91      | 15.32 <sup>c</sup> |
|                       | C  | 32.64      | 8.41 <sup>c</sup>  | 30.21      | 8.12 <sup>c</sup>  | 56.61          | 12.50 <sup>c</sup> | 55.11      | 12.39 <sup>c</sup> | 37.17         | 8.42 <sup>c</sup>  | 35.35      | 8.19 <sup>c</sup>  |
|                       | DZ | 49.24      | 6.79 <sup>c</sup>  | 48.88      | 6.76 <sup>c</sup>  | 53.27          | 7.62 <sup>c</sup>  | 53.30      | 7.62 <sup>c</sup>  | 49.11         | 6.35 <sup>c</sup>  | 48.86      | 6.33 <sup>c</sup>  |
|                       | MZ | 1.48       | 1.97 <sup>h</sup>  | 1.47       | 1.97 <sup>h</sup>  | 4.47           | 2.32 <sup>a</sup>  | 4.47       | 2.32 <sup>a</sup>  | 2.49          | 1.50 <sup>a</sup>  | 2.49       | 1.50 <sup>a</sup>  |
| $\sigma_{residual}^2$ | A  | 49.13      | 3.73 <sup>c</sup>  | 49.13      | 3.73 <sup>c</sup>  | 52.53          | 3.97 <sup>c</sup>  | 52.50      | 3.97 <sup>c</sup>  | 37.50         | 2.84 <sup>c</sup>  | 37.49      | 2.84 <sup>c</sup>  |
|                       | C  | 44.29      | 3.07 <sup>c</sup>  | 44.27      | 3.07 <sup>c</sup>  | 57.46          | 3.97 <sup>c</sup>  | 57.49      | 3.98 <sup>c</sup>  | 33.09         | 2.28 <sup>c</sup>  | 33.11      | 2.28 <sup>c</sup>  |
|                       | DZ | 43.58      | 2.39 <sup>c</sup>  | 43.58      | 2.39 <sup>c</sup>  | 53.81          | 2.97 <sup>c</sup>  | 53.82      | 2.97 <sup>c</sup>  | 33.17         | 1.82 <sup>c</sup>  | 33.18      | 1.82 <sup>c</sup>  |
|                       | MZ | 46.77      | 2.45 <sup>c</sup>  | 46.78      | 2.45 <sup>c</sup>  | 50.97          | 2.63 <sup>c</sup>  | 50.97      | 2.63 <sup>c</sup>  | 33.24         | 1.73 <sup>c</sup>  | 33.24      | 1.73 <sup>c</sup>  |

<sup>a</sup> $p < .05$ , <sup>b</sup> $p < .01$ , <sup>c</sup> $p < .001$ ; <sup>f</sup> $p < .05$  1-tailed, FDR corrected, <sup>t</sup> $p < .05$  2-tailed, FDR corrected

Note.  $N = 1321$ . Covariates included: Study (CAP = -.5, LTS = .5), Sex (Male = 0, Female = 1), Adopted (0=Not, 1=Adopted); Age was centered at 16 years; White (0=non-White, 1=White); Hispanic (0=non-Hispanic, 1= Hispanic);  $\epsilon_2$  number of alleles (0,1,2);  $\epsilon_4$  number of alleles (0,1,2). Random effects by family type are denoted as: A=Adoptive, C=Control, DZ=dizygotic twins, MZ=monozygotic twins.  $\sigma_{within}^2$  = variance in IQ performance within sibships that is systematic across assessments (indicative of sibling dissimilarity);  $\sigma_{between}^2$  = variance in IQ performance between sibships that is systematic across assessments (indicative of sibling similarity);  $\sigma_{residual}^2$  = within-person, occasion-specific variance.

**Table S7. Multilevel fixed effects of APOE ε4 on IQ across Year 7, 12 and 16 assessments: testing for non-additivity of APOE ε4 heterozygotes**

| Verbal IQ<br>Fixed Effects      | Model I.a |                   |        |        | Model I.b |                   |        |        | Model I.c |                   |        |        |
|---------------------------------|-----------|-------------------|--------|--------|-----------|-------------------|--------|--------|-----------|-------------------|--------|--------|
|                                 | B         | se                | LL     | UL     | B         | se                | LL     | UL     | B         | se                | LL     | UL     |
| Intercept                       | 103.28    | 1.72 <sup>c</sup> | 99.90  | 106.65 | 107.75    | 2.11 <sup>c</sup> | 103.61 | 111.89 | 107.84    | 2.37 <sup>c</sup> | 103.19 | 112.49 |
| Study                           | -7.48     | 1.16 <sup>c</sup> | -9.76  | -5.20  | -7.47     | 1.15 <sup>c</sup> | -9.73  | -5.20  | -7.46     | 1.15 <sup>c</sup> | -9.73  | -5.20  |
| Adopted                         | -3.45     | 0.99 <sup>c</sup> | -5.38  | -1.52  | -3.53     | 0.98 <sup>c</sup> | -5.44  | -1.62  | -3.53     | 0.98 <sup>c</sup> | -5.44  | -1.61  |
| Sex                             | -1.88     | 0.73 <sup>a</sup> | -3.32  | -0.43  | -1.84     | 0.73 <sup>a</sup> | -3.28  | -0.40  | -1.84     | 0.73 <sup>a</sup> | -3.28  | -0.40  |
| Sex*study                       | 3.41      | 1.47 <sup>a</sup> | 0.53   | 6.29   | 3.32      | 1.47 <sup>a</sup> | 0.44   | 6.19   | 3.32      | 1.47 <sup>a</sup> | 0.44   | 6.20   |
| Age                             | -0.36     | 0.03 <sup>c</sup> | -0.43  | -0.30  | -0.36     | 0.03 <sup>c</sup> | -0.43  | -0.30  | -0.36     | 0.03 <sup>c</sup> | -0.43  | -0.30  |
| White                           | 1.02      | 1.32 <sup>-</sup> | -1.57  | 3.61   | 0.95      | 1.31 <sup>-</sup> | -1.62  | 3.53   | 0.96      | 1.32 <sup>-</sup> | -1.62  | 3.54   |
| Hispanic                        | -5.41     | 1.99 <sup>b</sup> | -9.32  | -1.50  | -5.28     | 1.99 <sup>b</sup> | -9.19  | -1.38  | -5.28     | 1.99 <sup>b</sup> | -9.19  | -1.38  |
| ε2 additive                     | -0.48     | 0.86 <sup>-</sup> | -2.17  | 1.20   | 3.80      | 1.45 <sup>b</sup> | 0.95   | 6.65   | 3.80      | 1.45 <sup>b</sup> | 0.95   | 6.65   |
| ε4 additive                     | -1.73     | 0.70 <sup>a</sup> | -3.10  | -0.37  | -1.75     | 0.69 <sup>a</sup> | -3.11  | -0.39  | -1.65     | 1.30 <sup>-</sup> | -4.20  | 0.89   |
| ε2 dominance                    | --        | --                | --     | --     | -6.04     | 1.67 <sup>c</sup> | -9.31  | -2.78  | -6.04     | 1.67 <sup>c</sup> | -9.31  | -2.78  |
| ε4 dominance                    | --        | --                | --     | --     | --        | --                | --     | --     | -0.12     | 1.44 <sup>-</sup> | -2.94  | 2.70   |
| Performance IQ<br>Fixed Effects | Model I.a |                   |        |        | Model I.b |                   |        |        | Model I.c |                   |        |        |
|                                 | B         | se                | LL     | UL     | B         | se                | LL     | UL     | B         | se                | LL     | UL     |
| Intercept                       | 102.68    | 1.75 <sup>c</sup> | 99.25  | 106.10 | 105.41    | 2.12 <sup>c</sup> | 101.25 | 109.58 | 106.59    | 2.41 <sup>c</sup> | 101.85 | 111.32 |
| Study                           | -10.10    | 1.07 <sup>c</sup> | -12.21 | -8.00  | -10.12    | 1.07 <sup>c</sup> | -12.22 | -8.02  | -10.07    | 1.07 <sup>c</sup> | -12.17 | -7.97  |
| Adopted                         | -1.35     | 1.06 <sup>-</sup> | -3.43  | 0.74   | -1.39     | 1.06 <sup>-</sup> | -3.48  | 0.69   | -1.35     | 1.06 <sup>-</sup> | -3.44  | 0.73   |
| Sex                             | -1.14     | 0.70 <sup>-</sup> | -2.50  | 0.23   | -1.13     | 0.69 <sup>-</sup> | -2.49  | 0.23   | -1.13     | 0.69 <sup>-</sup> | -2.49  | 0.23   |
| Sex*study                       | 3.98      | 1.39 <sup>b</sup> | 1.25   | 6.71   | 3.96      | 1.39 <sup>b</sup> | 1.24   | 6.69   | 3.94      | 1.39 <sup>b</sup> | 1.21   | 6.66   |
| Age                             | -0.79     | 0.03 <sup>c</sup> | -0.86  | -0.72  | -0.79     | 0.03 <sup>c</sup> | -0.86  | -0.72  | -0.79     | 0.03 <sup>c</sup> | -0.86  | -0.72  |
| White                           | 1.03      | 1.38 <sup>-</sup> | -1.68  | 3.73   | 1.02      | 1.38 <sup>-</sup> | -1.69  | 3.72   | 1.10      | 1.38 <sup>-</sup> | -1.61  | 3.80   |
| Hispanic                        | -0.07     | 1.82 <sup>-</sup> | -3.63  | 3.49   | 0.08      | 1.82 <sup>-</sup> | -3.49  | 3.64   | 0.10      | 1.82 <sup>-</sup> | -3.45  | 3.66   |
| ε2 additive                     | -0.28     | 0.84 <sup>-</sup> | -1.92  | 1.37   | 2.36      | 1.44 <sup>-</sup> | -0.47  | 5.19   | 2.33      | 1.44 <sup>-</sup> | -0.50  | 5.16   |
| ε4 additive                     | -1.86     | 0.70 <sup>b</sup> | -3.24  | -0.48  | -1.85     | 0.70 <sup>b</sup> | -3.23  | -0.48  | -0.62     | 1.37 <sup>-</sup> | -3.31  | 2.08   |
| ε2 dominance                    | --        | --                | --     | --     | -3.77     | 1.68 <sup>a</sup> | -7.06  | -0.48  | -3.74     | 1.68 <sup>a</sup> | -7.03  | -0.45  |
| ε4 dominance                    | --        | --                | --     | --     | --        | --                | --     | --     | -1.59     | 1.51 <sup>-</sup> | -4.55  | 1.37   |
| Full Scale IQ<br>Fixed Effects  | Model I.a |                   |        |        | Model I.b |                   |        |        | Model I.c |                   |        |        |
|                                 | B         | se                | LL     | UL     | B         | se                | LL     | UL     | B         | se                | LL     | UL     |
| Intercept                       | 102.89    | 1.66 <sup>c</sup> | 99.64  | 106.15 | 106.98    | 2.03 <sup>c</sup> | 103.00 | 110.97 | 107.63    | 2.29 <sup>c</sup> | 103.13 | 112.13 |
| Study                           | -9.51     | 1.09 <sup>c</sup> | -11.65 | -7.36  | -9.51     | 1.09 <sup>c</sup> | -11.65 | -7.38  | -9.49     | 1.09 <sup>c</sup> | -11.63 | -7.36  |
| Adopted                         | -2.75     | 1.00 <sup>b</sup> | -4.71  | -0.79  | -2.82     | 0.99 <sup>b</sup> | -4.77  | -0.88  | -2.81     | 0.99 <sup>b</sup> | -4.75  | -0.86  |
| Sex                             | -1.67     | 0.70 <sup>a</sup> | -3.03  | -0.30  | -1.64     | 0.70 <sup>a</sup> | -3.01  | -0.28  | -1.65     | 0.70 <sup>a</sup> | -3.01  | -0.28  |



|              |       |                   |       |       |       |                   |       |       |       |                   |       |       |
|--------------|-------|-------------------|-------|-------|-------|-------------------|-------|-------|-------|-------------------|-------|-------|
| Sex*study    | 4.01  | 1.40 <sup>b</sup> | 1.27  | 6.75  | 3.95  | 1.39 <sup>b</sup> | 1.22  | 6.68  | 3.95  | 1.39 <sup>b</sup> | 1.22  | 6.68  |
| Age          | -0.63 | 0.03 <sup>c</sup> | -0.69 | -0.58 | -0.63 | 0.03 <sup>c</sup> | -0.69 | -0.58 | -0.63 | 0.03 <sup>c</sup> | -0.69 | -0.58 |
| White        | 1.17  | 1.28 <sup>-</sup> | -1.34 | 3.69  | 1.13  | 1.28 <sup>-</sup> | -1.38 | 3.63  | 1.16  | 1.28 <sup>-</sup> | -1.34 | 3.67  |
| Hispanic     | -3.01 | 1.85 <sup>-</sup> | -6.63 | 0.61  | -2.85 | 1.84 <sup>-</sup> | -6.47 | 0.77  | -2.84 | 1.84 <sup>-</sup> | -6.46 | 0.77  |
| ε2 additive  | -0.54 | 0.83 <sup>-</sup> | -2.17 | 1.09  | 3.39  | 1.40 <sup>a</sup> | 0.64  | 6.14  | 3.36  | 1.40 <sup>a</sup> | 0.61  | 6.11  |
| ε4 additive  | -2.04 | 0.68 <sup>b</sup> | -3.37 | -0.71 | -2.04 | 0.68 <sup>b</sup> | -3.37 | -0.72 | -1.37 | 1.28 <sup>-</sup> | -3.88 | 1.13  |
| ε2 dominance | --    | --                | --    | --    | -5.56 | 1.61 <sup>c</sup> | -8.73 | -2.40 | -5.54 | 1.61 <sup>c</sup> | -8.71 | -2.38 |
| ε4 dominance | --    | --                | --    | --    | --    | --                | --    | --    | -0.88 | 1.41 <sup>-</sup> | -3.64 | 1.89  |

<sup>a</sup> $p < .05$ , <sup>b</sup> $p < .01$ , <sup>c</sup> $p < .001$

*Note.* Covariates coded as follows: Study (CAP = -.5, LTS = .5), Sex (Male = 0, Female = 1), Adopted (0=Not, 1=Adopted); Age was centered at 16 years; White (0=non-White, 1=White); Hispanic (0=non-Hispanic, 1= Hispanic); ε2 additive for 0, 1, and 2 alleles (-1,0,1); ε4 additive for 0, 1, and 2 alleles (-1,0,1); ε2 dominance for 0, 1, and 2 alleles (0,1,0); ε4 dominance for 0, 1, and 2 alleles (0,1,0). For Model 1.a, all regression weights are identical to Model 1 (c.f. Supplementary Table S4) apart from the intercept, which now reflects the average IQ across those with ε2/ε2 and ε4/ε4 genotypes.

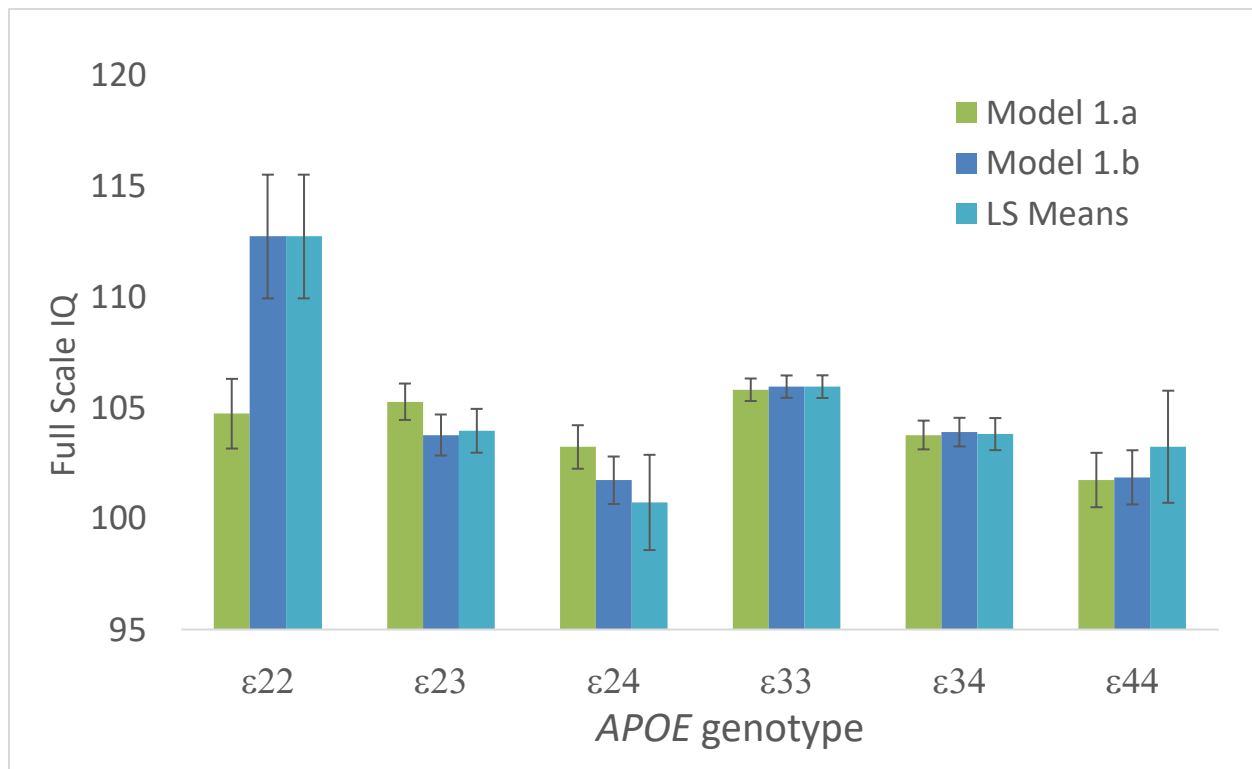

**Figure S1.** Comparison of Full scale IQ means by models testing for APOE  $\epsilon 2$  and  $\epsilon 4$  additive effects (Model 1.a) plus  $\epsilon 2$  non-additive effects (Models 1.b), versus a no model imposed on APOE genotypes (LS means).

*Figure Note.* Standard errors shown. Analyses adjusted for nesting of individuals within family type. Estimated means assumed 0 values on all covariates, except for sex which was averaged across males and females (sex = .5) and race (White = 1). In models 1.a and 1.b, APOE additive effects were entered for  $\epsilon 2$  and  $\epsilon 4$ . In Model 1.b, the  $\epsilon 2$  dominance effect is entered. For the means reported under the label 'LS Means', the same covariate adjustments are made but with no model imposed on genotypes.

*Analysis notes* (cf., 3.2.1 *Tests of non-additivity*). Figure S1 displays Full scale IQ by APOE genotypes, with expected mean IQ values based on Models 1.a and Model 1.b (see Table S7 above) as well as least-squares estimated means adjusted for the same covariates but with no model assumptions for APOE genotypes (i.e., APOE genotype is treated as a class variable). As indicated in the figure, the Model 1.b estimated means are closer to the least-squares means. The highest IQ was observed for APOE  $\epsilon 2/\epsilon 2$  homozygotes versus all other genotypes, followed by  $\epsilon 3/\epsilon 3$ , and the lowest performance was among those who carry one or more  $\epsilon 4$  alleles. Based on the model-free least-squares estimates (LS means),  $\epsilon 2/\epsilon 2$  differed from all other APOE genotypes [contrast = 9.1872 (se= 2.8591);  $t(107) = 3.21$ ,  $p = .0017$ ]. Although  $\epsilon 2/\epsilon 4$  displayed the lowest expected IQ,  $\epsilon 2/\epsilon 4$  did not differ significantly from  $\epsilon 3/\epsilon 4$  and  $\epsilon 4/\epsilon 4$  [contrast = -2.7982 (se = 2.5029);  $t(107) = -1.12$ ,  $p = .2661$ ]. Last,  $\epsilon 3/\epsilon 3$  differed significantly from  $\epsilon 2/\epsilon 4$ ,  $\epsilon 3/\epsilon 4$  and  $\epsilon 4/\epsilon 4$  collectively [contrast = 3.3606 (se= 1.2080);  $t(107) = 2.78$ ,  $p = .0064$ ].
